# Supplementary material for: Modern Era Experience with Concurrent Liver Transplantation and Sleeve Gastrectomy: A MBSAQIP-Based Analysis of 30-Day Outcomes
Source: Research Square preprint supplement (doi:10.21203/rs.3.rs-7237223/v1), 2025-10-21
Supplement: Supplementary file 1 [file 31b54b0285326a7a06ce8b21.docx]

**Table I:** Baseline demographics, procedural data, and outcomes of patients undergoing sleeve gastrectomy with and without concurrent liver transplant

| Characteristic | Sleeve gastrectomy with Liver Transplant (N=22) | Sleeve gastrectomy alone (N=523,221) | *P-*Value |
| --- | --- | --- | --- |
| Age | 49.5 ± 8.8 | 42.9 ± 11.9 | 0.01 |
| BMI (kg/m2) | 47.5 ± 4.9 | 44.8 ± 7.7 | 0.0001 |
| Female sex | 4 (18.2) | 427,315 (81.7) | <0.0001 |
| Functional status |  | | 0.02 |
| Independent | 21 (95.5) | 520,244 (99.5) |
| Partially dependent | 1 (4.6) | 2,399 (0.46) |
| Totally dependent | 0 (0.0) | 117 (0.02) |
| Comorbidities |  | | |
| Tobacco use | 3 (13.6) | 34,704 (6.6) | 0.19 |
| Sleep apnea | 10 (45.5) | 182,442 (34.9) | 0.30 |
| Diabetes |  |  | 0.001 |
| IIDM | 5 (22.7) | 25,556 (4.9) |
| IDDM | 3 (13.6) | 81,749 (15.6) |
| Hypertension | 11 (50.0) | 220,641 (42.2) | 0.46 |
| COPD | 0 (0.0) | 5,452 (1.04) | 0.63 |
| Hyperlipidemia | 3 (13.6) | 109,918 (21.0) | 0.40 |
| Renal insufficiency | 0 (0.0) | 2,765 (0.53) | 0.73 |
| Dialysis | 3 (13.6) | 1,856 (0.35) | <0.0001 |
| History of MI | 1 (4.6) | 4,883 (0.93) | 0.08 |
| History VTE | 3 (13.6) | 12,749 (22.4) | 0.001 |
| Therapeutic AC | 3 (13.6) | 14,742 (2.82) | 0.002 |
| Categorical data are presented as percentage (%) and continuous data are presented as mean (±standard deviation). *BMI*, body mass index. *IIDM,* Insulin-Dependent Diabetes Mellitus. *IDDM,* Insulin-Independent Diabetes Mellitus. *COPD,* chronic obstructive pulmonary disease. *VTE,* Venous thromboembolic event. *AC,* anticoagulation. | | | |
