# Supplementary material for: Modern Era Experience with Concurrent Liver Transplantation and Sleeve Gastrectomy: A MBSAQIP-Based Analysis of 30-Day Outcomes
Source: Research Square preprint supplement (doi:10.21203/rs.3.rs-7237223/v1), 2025-10-21
Supplement: Supplementary file 2 [file 3fc6ffe0392a4168eafe6d7a.docx]

**Table II:** Multivariable logistic regression analysis of factors associated with serious complications after concurrent sleeve gastrectomy

| Characteristic | Adjusted odds ratio | 95% Confidence Interval | *P-*Value |
| --- | --- | --- | --- |
| Age (years) | 1.12 | 1.10-1.14 | <0.0001 |
| Female sex | 0.88 | 0.84-0.92 | <0.001 |
| BMI (kg/m2) | 1.04 | 1.03-1.06 | <0.0001 |
| Diabetes |  |  |  |
| IIDM | 1.02 | 0.97-1.08 | 0.40 |
| IDDM | 1.29 | 1.19-1.40 | <0.0001 |
| Liver Transplant | 23.2 | 9.62-55.83 | <0.0001 |
| History of MI | 1.46 | 1.27-1.69 | <0.0001 |
| Hypertension | 1.20 | 1.15-1.26 | <0.0001 |
| Renal insufficiency | 2.38 | 2.03-2.79 | <0.0001 |
| Therapeutic anticoagulation | 2.07 | 1.90-2.25 | <0.0001 |
| *BMI,* Body Mass Index. *IIDM,* Insulin-Dependent Diabetes Mellitus. *IDDM,* Insulin-Independent Diabetes Mellitus. *MI*, Myocardial Infarction. | | | |
